# Supplementary material for: Pyrroloquinoline quinone: a potential neuroprotective compound for neurodegenerative diseases targeting metabolism
Source: PubMed Central journal article supplement — Neural Regen Res. 2024 Apr 3;20(1):41–53. doi: 10.4103/NRR.NRR-D-23-01921 (PMC11246121; doi:10.4103/nrr.nrr-d-23-01921), 2024-04-03
Supplement: NRR-20-41_Suppl1.pdf [file NRR-20-41_Suppl1.pdf]

## OPEN PEER REVIEW REPORT 1

**Name of journal:** Neural Regeneration Research

**Manuscript NO:** NRR-D-23-01921

**Title:** Pyrroloquinoline quinone: a potential neuroprotective compound for neurodegenerative diseases targeting metabolism

**Reviewer's Name:** Robert B. Rucker

**Reviewer's country:** USA

### COMMENTS TO AUTHORS

Overall evaluation on article quality: The review paper, "Pyrroloquinoline quinone: a potential neuroprotective compound for neurodegenerative diseases targeting metabolism" is exceptional in addressing contemporary issues centered on the actions of PQQ and its clinical potential as a neuroprotective compound.

Scope evaluation on article: The components of the paper addressing scope are well-chosen, and the descriptions are well-crafted. Each section of the article is presented with clarity and appropriate depth.

Direction evaluation on article: Novelty evaluation on article:

Timeliness evaluation on article: The nuanced approaches (when needed) taken by the authors were also appreciated. The paper accurately conveys contemporary ideas and theories, making it accessible yet intellectually stimulating.

Direction evaluation on article:

The paper's focus - PQQ and its clinical potential as a neuroprotective compound – has not received this level of timely attention.

Novelty evaluation on article:

It should be value for those with interest in potential neuroprotective agents.

In summary, I have no substantial criticisms. The paper is well-written, organized, and referenced. Its in-depth analysis should be helpful for anyone interested in pyrroloquinoline quinone, particularly its potential neuroprotective compound.
